# Supplementary material for: Dietary methionine restriction improves the impairment of cardiac function in middle-aged obese mice
Source: Royal Society of Chemistry journal article supplement (doi:10.1039/c9fo02819f), 2020-01-01
Supplement: c9fo02819f1.pdf [file c9fo02819f1.pdf]

## Supporting information

### Supplemental Tables

**Table S1** The compositions of the experimental diets (g/100g)

| Ingredient                  | CON    | CMR40  | CMR80  | HF     | HMR40  | HMR80  |
|-----------------------------|--------|--------|--------|--------|--------|--------|
| Soy protein                 | 7.59   | 7.59   | 7.59   | 7.59   | 7.59   | 7.59   |
| L-Arginine                  | 0.66   | 0.66   | 0.66   | 0.66   | 0.66   | 0.66   |
| L-Histidine                 | 0.18   | 0.18   | 0.18   | 0.18   | 0.18   | 0.18   |
| L-Isoleucine                | 0.51   | 0.51   | 0.51   | 0.51   | 0.51   | 0.51   |
| L-Leucine                   | 0.64   | 0.64   | 0.64   | 0.64   | 0.64   | 0.64   |
| L-Lysine                    | 0.11   | 0.11   | 0.11   | 0.11   | 0.11   | 0.11   |
| L-Methionine                | 0.69   | 0.346  | 0.00   | 0.69   | 0.346  | 0.00   |
| L-Phenylalanine             | 0.85   | 0.85   | 0.85   | 0.85   | 0.85   | 0.85   |
| L-Threonine                 | 0.65   | 0.65   | 0.65   | 0.65   | 0.65   | 0.65   |
| L-Tryptophan                | 0.1    | 0.1    | 0.1    | 0.1    | 0.1    | 0.1    |
| L-Valine                    | 0.57   | 0.57   | 0.57   | 0.57   | 0.57   | 0.57   |
| L-Glutamic acid             | 1.37   | 1.72   | 2.06   | 1.37   | 1.72   | 2.06   |
| L-Glycine                   | 2.08   | 2.08   | 2.08   | 2.08   | 2.08   | 2.08   |
| Corn starch                 | 64.09  | 64.09  | 64.09  | 44.29  | 44.29  | 44.29  |
| maltodextrin                | 5.00   | 5.00   | 5.00   | 5.00   | 5.00   | 5.00   |
| Sucrose                     | 0.10   | 0.10   | 0.10   | 0.10   | 0.10   | 0.10   |
| Soybean oil                 | 2.00   | 2.00   | 2.00   | 2.00   | 2.00   | 2.00   |
| Pork Lard                   | 2.20   | 2.20   | 2.20   | 22.00  | 22.00  | 22.00  |
| Cellulose                   | 5.00   | 5.00   | 5.00   | 5.00   | 5.00   | 5.00   |
| Mineral mixture-<br>AIN-76A | 3.50   | 3.50   | 3.50   | 3.50   | 3.50   | 3.50   |
| Mineral vitamin-<br>AIN-76A | 1.00   | 1.00   | 1.00   | 1.00   | 1.00   | 1.00   |
| Choline chloride            | 0.11   | 0.11   | 0.11   | 0.11   | 0.11   | 0.11   |
| CMC                         | 1.00   | 1.00   | 1.00   | 1.00   | 1.00   | 1.00   |
| Total                       | 100.00 | 100.00 | 100.00 | 100.00 | 100.00 | 100.00 |

CON,CMR40 and CMR80 diet, was mainly based upon the AIN-76A formulation; 73%, 17% and 10% of calories from carbohydrate, protein, and fat, respectively; energy density 3.8kcal/g. HF, HMR40,HMR80 41%, 14% and 45% of calories from carbohydrate, protein, and fat, respectively; energy density 4.7 kcal/g.

Amino acid composition of soy protein were as follows: 6.19% leucine, 4.11% isoleucine, 5.49% valine, 1.18% methionine, 1.66% cysteine, 4.09% phenylalanine, 2.57% tyrosine, 4.83% lysine,

2.21% threonine, 1.07% tryptophan, 1.99% histidine, 6.11% arginine, 3.30% serine, 3.25% alanine, 5.56% proline, 3.27% glycine, 17.49% glutamic acid 9.44% aspartic acid. 1 g cysteine is equal to 0.64 g methionine.

**Table S2** Sequence of primers in quantitative real-time reverse transcription polymerase chain reaction

| Genes           | Forward(5'–3')               | Reverse (5'–3')         |
|-----------------|------------------------------|-------------------------|
| ANP             | GCTTCCAGGCCATATTGGAG         | GGGGGCATGACCTCATCTT     |
| BNP             | GAGGTCACCTCTATCCTCTGG        | GCCATTTCTCCGACTTTTCTC   |
| PGC-1- $\alpha$ | TATGGAGTGACATAGAGTGTGCT      | CCACTTCAATCCACCCAGAAAG  |
| AMPK            | GTCAAAGCCGACCCAATGATA        | CGTACACGCAAATAATAGGGGTT |
| SIRT1           | GCTGACGACTTCGACGACG          | TCGGTCAACAGGAGGTTGTCT   |
| CBS             | CCAGGCACCTGTGGTCAAC          | GGTCTCGTGATTGGATCTGCT   |
| CSE             | TTCCTGCCTAGTTTCCAGCAT        | GGAAGTCCTGCTTAAATGTGGTG |
| MTHFR           | CTGGGCACTGTTATCCATCCC        | TCCTGCTGATAGAGGGTGGC    |
| Mtr             | ATGATCCAGCGGTACAAACTAAG      | CATCCGGTAGGCCAAGTGTC    |
| Nrf2            | TTCCTCTGCTGCCATTAGTCAGTC     | GCTCTTCCATTTCCGAGTCACTG |
| HO-1            | CAGAAGGGTCAGGTGTCCAG         | GAAGGCCATGTCCTGCTCTA    |
| NQO-1           | ACATCACAGGGGAGCCGAAGGAC<br>T | GGCACCCCAAACCAATACAATG  |
| Bax             | CATGAAGACAGGGGCCTTTTTG       | TCAGCTTCTTGGTGGATGCGTC  |
| Bcl-2           | ACTTCTCTCGTCGCTACCGTCG       | CCTGAAGAGTTCCTCCACCACC  |
